# Supplementary material
Source: Research Square preprint supplement (doi:10.21203/rs.3.rs-9038046/v1)
Supplement: Supplementary file [file cf855677028718cd80b1da75.pdf]

## Supplementary Tables

### Supplementary Table 1 Sequencing reads for *Eucalyptus viminalis* ACT, VIC and TAS.

All PacBio HiFi reads, filtered ONT ultra-long reads ( $\geq 55$  kb and  $\geq Q20$ ) and filtered Hi-C reads (described in next table) were used in the genome assembly of *E. viminalis* ACT. Only filtered ONT reads ( $\geq 20$  kb and  $\geq Q20$ ) were used in the genome assembly of *E. viminalis* VIC and TAS. Therefore, these reads were filtered more stringently, but also benefited from updated sequencing chemistry and assembly tools.

|                                         | Evim ACT       |                 |                               | Evim VIC        |                                | Evim TAS        |                                |
|-----------------------------------------|----------------|-----------------|-------------------------------|-----------------|--------------------------------|-----------------|--------------------------------|
| Metric                                  | HiFi           | ONT             | ONT $\geq 55$ kb<br>$\geq Q7$ | ONT             | ONT $\geq 20$ kb<br>$\geq Q20$ | ONT             | ONT $\geq 20$ kb<br>$\geq Q20$ |
| Reads                                   | 1,493,183      | 6,802,892       | 471,525                       | 3,119,232       | 1,182,139                      | 2,684,427       | 894,493                        |
| Yield (bp)                              | 30,268,834,753 | 176,995,195,958 | 32,674,908,869                | 85,888,723,721  | 53,511,358,482                 | 66,828,255,396  | 40,656,940,200                 |
| Mean read length (bp)                   | 20,271.3       | 26,017.6        | 69,296.2                      | 27,535.2        | 45,266.6                       | 24,894.8        | 45,452.5                       |
| Median read length (bp)                 | 19,515         | 23,524          | 64,736                        | 28,391          | 42,292                         | 19,822          | 42,314                         |
| N50 (bp)                                | 20,332         | 36,617          | 66,993                        | 46,246          | 47,264                         | 46,378          | 47,725                         |
| Mean read quality                       | 29.2           | 16.4            | 17.5                          | 9.8             | 22.6                           | 9.2             | 22.6                           |
| Median read quality                     | 30.2           | 18.9            | 18.4                          | 20.5            | 23.6                           | 20.1            | 23.6                           |
| Five longest read lengths (and Q score) |                |                 |                               |                 |                                |                 |                                |
| #1                                      | 55,114 (15.2)  | 463,629 (3.5)   | 564,886 (7.5)                 | 1,875,904 (6.2) | 375,909 (21.3)                 | 1,410,201 (5.2) | 307,800 (23.5)                 |
| #2                                      | 55,332 (24.0)  | 469,113 (3.9)   | 484,984 (7.3)                 | 1,843,354 (6.2) | 281,550 (22.9)                 | 1,385,395 (3.5) | 284,444 (21.6)                 |
| #3                                      | 55,411 (15.1)  | 484,984 (7.3)   | 293,940 (19.6)                | 1,554,198 (5.5) | 269,294 (24.3)                 | 1,218,598 (4.5) | 259,566 (20.1)                 |
| #4                                      | 56,218 (17.9)  | 564,886 (7.5)   | 286,672 (19.9)                | 1,310,354 (6.4) | 254,787 (24.0)                 | 1,191,299 (2.9) | 258,757 (20.8)                 |
| #5                                      | 57,165 (15.8)  | 806,429 (2.7)   | 282,977 (7.8)                 | 1,271,470 (6.3) | 250,349 (25.0)                 | 1,123,223 (8.2) | 251,260 (21.3)                 |
|                                         |                |                 |                               |                 |                                |                 |                                |
| Coverage (547 Mbp genome)               | 55x            | 324x            | 60x                           | 157x            | 98x                            | 122x            | 74x                            |
| Coverage per haplotype                  | 28x            | 162x            | 30x                           | 79x             | 49x                            | 61x             | 37x                            |

**Supplementary Table 2. Hi-C sequencing results and chromosomal linkage statistics for the *E. viminalis* ACT reference genome.** Statistics are shown for both haplotypes and were used for chromosome scaffolding and assembly validation.

|                                 | <b>Haplotype 1</b> | <b>Haplotype 2</b> |
|---------------------------------|--------------------|--------------------|
| <b>Hi-C Read Pairs</b>          | 89,043,318         |                    |
| <b>Inter-chromosomal</b>        | 10,570,983         | 10,599,530         |
| <b>Intra-chromosomal</b>        | 19,716,057         | 19,602,535         |
| <b>Uninformative Read Pairs</b> | 58,756,278         | 58,841,253         |

**Supplementary Table 3. Genome assembly statistics for *Eucalyptus viminalis* ACT, VIC and TAS.** For each genome, the 11 chromosomes were haplotype resolved, at chromosome scale or higher (many being telomere-to-telomere). The *E. viminalis* ACT genome (first genome) was constructed with PacBio HiFi, ONT ultra-long and Hi-C. The *E. viminalis* VIC and TAS genomes were assembled with ONT ultra-long reads only, but benefited from newer sequencing chemistry and assembly algorithms, having only 1 gap at the chromosome two centromere. Karyotype is  $2n = 22$ .

| Metric           | Evim ACT    |             | Evim VIC    |             | Evim TAS    |             |
|------------------|-------------|-------------|-------------|-------------|-------------|-------------|
|                  | Hap1        | Hap2        | Hap 1       | Hap 2       | Hap 1       | Hap 2       |
| Sequences        | 294         | 287         | 392         | 25          | 298         | 28          |
| Sequences >1 Mbp | 11          | 11          | 11          | 11          | 11          | 11          |
| N50 (bp)         | 51,735,356  | 50,558,970  | 43,272,629  | 52,040,736  | 40,964,566  | 52,728,202  |
| N50 (bp) >1 Mbp  | 51,735,356  | 50,558,970  | 51,281,642  | 52,040,736  | 50,289,127  | 53,905,933  |
| Size (bp)        | 546,531,677 | 551,267,619 | 589,735,305 | 531,995,131 | 559,924,252 | 536,652,899 |
| Size (bp) >1 Mbp | 530,050,200 | 530,973,922 | 538,353,018 | 529,912,749 | 526,300,622 | 533,344,571 |
| Telomeres        | 2/22        | 3/22        | 22/22       | 22/22       | 22/22       | 21/22       |
| T2T contigs      | 0/11        | 0/11        | 10/11       | 10/11       | 10/11       | 9/11        |
| T2T scaffolds    | 0/11        | 0/11        | 11/11       | 11/11       | 11/11       | 10/11       |
| Gaps             | 94          | 165         | 1           | 1           | 1           | 1           |
|                  |             |             |             |             |             |             |

**Supplementary Table 4. BUSCO completeness assessment of *E. viminalis* genome assemblies.** Single-copy orthologs from the eudicotyledons odb12 dataset were identified using compleasm v0.2.7 to evaluate the completeness of the 11 haplotype-resolved chromosomal scaffolds for each genome.

|          | Evim ACT          |                   | Evim VIC          |                   | Evim TAS          |                   |
|----------|-------------------|-------------------|-------------------|-------------------|-------------------|-------------------|
|          | Hap 1             | Hap 2             | Hap 1             | Hap 2             | Hap 1             | Hap 2             |
| BUSCO    |                   |                   |                   |                   |                   |                   |
| Complete | 99.61%<br>(2,794) | 99.68%<br>(2,796) | 99.72%<br>(2,797) | 99.72%<br>(2,797) | 99.72%<br>(2,797) | 99.68%<br>(2,796) |
| Single   | 98.11             | 97.79%            | 97.83%            | 98.04%            | 98.40%            | 97.93%            |



**Supplementary Table 5. Assembly quality assessment using Quality Value (QV) scores for haplotype-resolved *E. viminalis* genomes.** Assembly accuracy was assessed using yak v0.1 (r56) with default k=31 for each chromosome-scale haplotype (Cheng et al 2021 <https://www.nature.com/articles/s41592-020-01056-5>). Raw and coverage adjusted QV scores are shown as Phred-scaled values and accuracy percentages.

|               | Evim ACT (HiFi) |           | Evim VIC (ONT ≥20 kb ≥Q20) |           | Evim TAS (ONT ≥20 kb ≥Q20) |           |
|---------------|-----------------|-----------|----------------------------|-----------|----------------------------|-----------|
|               | Hap 1           | Hap 2     | Hap 1                      | Hap 2     | Hap 1                      | Hap 2     |
| Raw QV        | 56.415          | 55.525    | 66.772                     | 67.085    | 64.368                     | 64.116    |
| Raw QV %      | 99.999772       | 99.999720 | 99.999979                  | 99.999980 | 99.999963                  | 99.999962 |
| Adjusted QV   | 57.591          | 55.845    | 64.562                     | 64.620    | 60.366                     | 60.395    |
| Adjusted QV % | 99.999826       | 99.999740 | 99.999965                  | 99.999965 | 99.999910                  | 99.999911 |

**Supplementary Table 6. ONT direct RNA sequencing results for an *E. viminalis* ACT leaf sample.** Reads were filtered to retain only those ≥200 bp in length and ≥Q10 quality score for the annotation of the genome and identification of isoforms.

| Metric                              | Raw RNA reads  | Filtered RNA reads |
|-------------------------------------|----------------|--------------------|
| Mean Read Length (bp)               | 1,134.2        | 1,303.4            |
| Mean Quality                        | 12.2           | 19.2               |
| Median Read Length (bp)             | 937.0          | 1,092.0            |
| Median Quality                      | 20.9           | 21.6               |
| Reads                               | 22,125,880     | 18,024,536         |
| N50                                 | 1,605.0        | 1,618.0            |
| STDEV read length                   | 1,130.1        | 877.9              |
| Yield (bp)                          | 25,094,940,983 | 23,493,482,035     |
| Five longest reads (and Q score) #1 | 241,297 (5.7)  | 27,417 (22.8)      |
| #2                                  | 224,525 (3.9)  | 25,793 (22.0)      |
| #3                                  | 210,414 (4.2)  | 21,167 (21.4)      |
| #4                                  | 208,103 (6.7)  | 20,781 (22.2)      |
| #5                                  | 205,564 (4.0)  | 20,457 (23.4)      |

**Supplementary Table 7. Sequencing summary from Oxford Nanopore Technologies (ONT) long-read sequencing of environmental samples (n = 72). after quality (average Q score > 7) and read size (minimum read length > 1 kb) filtering.**

|    | sample_name | coverage | num_reads | read_length_N50 | total_bases_Gb | max_read_length | median_read_length |
|----|-------------|----------|-----------|-----------------|----------------|-----------------|--------------------|
| 2  | NSW0083     | 8.95098  | 962129    | 6.156           | 4.70225        | 56.823          | 4.745              |
| 3  | NSW0105     | 11.4163  | 1486687   | 5.395           | 5.99737        | 61.321          | 3.132              |
| 4  | NSW0108     | 5.89502  | 685649    | 5.833           | 3.09686        | 43.319          | 4.271              |
| 5  | NSW0110     | 2.04307  | 225281    | 6.623           | 1.0733         | 44.32           | 3.978              |
| 6  | NSW0111     | 7.71839  | 992345    | 5.721           | 4.05473        | 42.2            | 3.167              |
| 7  | NSW0113     | 11.3181  | 950043    | 8.076           | 5.9458         | 66.902          | 5.839              |
| 8  | NSW0119     | 7.69559  | 864114    | 5.994           | 4.04276        | 47.049          | 4.427              |
| 9  | NSW0120     | 3.36433  | 429528    | 5.481           | 1.7674         | 79.467          | 3.651              |
| 10 | NSW0133     | 1.00533  | 154295    | 4.417           | 0.528136       | 42.071          | 2.562              |
| 11 | NSW0141     | 18.6357  | 1586697   | 7.729           | 9.78998        | 84.917          | 5.53               |
| 12 | NSW0144     | 13.3328  | 1213005   | 7.767           | 7.00416        | 74.695          | 4.778              |
| 13 | NSW0159     | 12.5647  | 884301    | 10.233          | 6.60067        | 84.868          | 6.54               |
| 14 | NSW0163     | 13.6504  | 1025529   | 9.094           | 7.17101        | 73.836          | 6.453              |
| 15 | NSW0170     | 17.7472  | 1428360   | 8.257           | 9.32323        | 92.544          | 5.734              |
| 16 | NSW0175     | 9.84936  | 829086    | 8.335           | 5.1742         | 98.098          | 5.216              |
| 17 | NSW0192     | 3.55784  | 437749    | 5.807           | 1.86906        | 47.266          | 3.498              |
| 18 | NSW0194     | 4.04678  | 472992    | 6.177           | 2.12591        | 121.675         | 3.702              |
| 19 | NSW0207     | 11.1162  | 1514158   | 5.189           | 5.8397         | 89.842          | 3.055              |
| 20 | NSW0209     | 2.39105  | 301305    | 5.776           | 1.2561         | 105.191         | 3.288              |
| 21 | NSW0250     | 16.8051  | 1240465   | 9.404           | 8.82829        | 87.516          | 6.374              |
| 22 | NSW0293     | 29.9479  | 1556811   | 13.1            | 15.7326        | 156.083         | 9.485              |
| 23 | NSW0296     | 13.7463  | 1044468   | 8.396           | 7.22143        | 73.649          | 6.264              |
| 24 | NSW0299     | 9.98593  | 1434379   | 4.918           | 5.24595        | 65.534          | 2.84               |
| 25 | NSW0306     | 24.4949  | 2717245   | 6.317           | 12.868         | 66.36           | 3.937              |
| 26 | NSW0308     | 19.8459  | 2221206   | 6.244           | 10.4257        | 343.493         | 3.921              |
| 27 | NSW0313     | 18.9491  | 1681010   | 7.596           | 9.95462        | 81.822          | 5.156              |
| 28 | NSW0315     | 6.49355  | 544534    | 8.263           | 3.41129        | 76.15           | 5.524              |
| 29 | NSW0323     | 9.19755  | 886616    | 6.575           | 4.83179        | 67.277          | 5.444              |
| 30 | NSW0324     | 14.9675  | 1095822   | 9.919           | 7.86292        | 82.278          | 6.192              |
| 31 | NSW0328     | 11.1906  | 775432    | 10.455          | 5.8788         | 105.051         | 6.5255             |
| 32 | NSW0334     | 12.7057  | 907636    | 10.161          | 6.67474        | 90.242          | 6.347              |
| 33 | NSW0335     | 10.751   | 806298    | 9.894           | 5.64788        | 71.769          | 5.852              |

|    |         |          |         |        |           |         |       |
|----|---------|----------|---------|--------|-----------|---------|-------|
| 34 | NSW0337 | 16.0358  | 1313350 | 7.708  | 8.42416   | 63.244  | 5.994 |
| 35 | NSW0341 | 13.883   | 1202451 | 7.381  | 7.29322   | 77.341  | 5.73  |
| 36 | NSW0343 | 11.1506  | 863310  | 9.66   | 5.85778   | 74.817  | 5.524 |
| 37 | NSW0347 | 9.58598  | 758783  | 9.411  | 5.03584   | 73.146  | 5.453 |
| 38 | NSW0348 | 10.1471  | 781891  | 9.652  | 5.33063   | 86.062  | 5.603 |
| 39 | NSW0350 | 15.6948  | 1651628 | 6.49   | 8.24502   | 61.998  | 4.421 |
| 40 | NSW0354 | 14.2373  | 1517831 | 6.588  | 7.47936   | 65.054  | 4.12  |
| 41 | NSW0356 | 13.5844  | 1428460 | 6.751  | 7.13637   | 59.6    | 3.999 |
| 42 | NSW0357 | 13.7632  | 1045792 | 8.816  | 7.23029   | 58.483  | 6.504 |
| 43 | NSW0359 | 16.8905  | 1608212 | 7.258  | 8.87317   | 79.355  | 4.755 |
| 44 | NSW0360 | 0.177873 | 21904   | 5.78   | 0.0934427 | 39.709  | 3.305 |
| 45 | NSW0366 | 21.2167  | 1967794 | 7      | 11.1459   | 102.709 | 5.291 |
| 46 | NSW0438 | 23.6787  | 1369640 | 11.573 | 12.4392   | 105.884 | 8.143 |
| 47 | NSW0482 | 0.643269 | 91807   | 4.935  | 0.337931  | 32.976  | 2.775 |
| 48 | NSW0491 | 17.7734  | 2328606 | 5.465  | 9.33695   | 52.861  | 3.165 |
| 49 | NSW0493 | 14.8659  | 1202607 | 8.905  | 7.80955   | 55.711  | 5.677 |
| 50 | NSW0496 | 20.0196  | 2301955 | 6.008  | 10.517    | 84.553  | 3.886 |
| 51 | NSW0507 | 0.891656 | 123623  | 5.077  | 0.468417  | 110.646 | 2.835 |
| 52 | NSW0532 | 17.8178  | 1163923 | 10.001 | 9.36032   | 90.239  | 7.416 |
| 53 | NSW0536 | 12.7913  | 1175455 | 7.649  | 6.71972   | 77.711  | 4.936 |
| 54 | NSW0544 | 18.8856  | 1480507 | 8.65   | 9.92127   | 90.58   | 6.162 |
| 55 | NSW0555 | 11.2373  | 1646519 | 4.768  | 5.90335   | 206.865 | 2.805 |
| 56 | NSW0561 | 13.5694  | 1104498 | 8.972  | 7.12846   | 66.231  | 5.372 |
| 57 | NSW0566 | 12.2311  | 1820740 | 4.64   | 6.42541   | 160.07  | 2.794 |
| 58 | NSW0573 | 12.383   | 1622781 | 5.407  | 6.50519   | 118.511 | 3.243 |
| 59 | NSW0575 | 8.35824  | 850173  | 6.382  | 4.39087   | 64.073  | 5.01  |
| 60 | NSW0576 | 20.1635  | 1455137 | 10.067 | 10.5926   | 100.658 | 6.28  |
| 61 | NSW0934 | 17.2554  | 1979918 | 6.175  | 9.06485   | 61.207  | 3.759 |
| 62 | NSW0935 | 2.77763  | 382010  | 5.059  | 1.45918   | 56.067  | 2.916 |
| 63 | NSW0936 | 1.81097  | 251023  | 5.055  | 0.951362  | 55.849  | 2.801 |
| 64 | NSW0938 | 2.33443  | 313364  | 5.242  | 1.22636   | 68.637  | 2.966 |
| 65 | NSW0939 | 4.3979   | 573694  | 5.349  | 2.31037   | 58.417  | 3.116 |
| 66 | NSW0940 | 3.20183  | 425685  | 5.346  | 1.68203   | 105.466 | 3.278 |
| 67 | NSW0954 | 6.24472  | 492787  | 8.714  | 3.28057   | 64.006  | 6.035 |
| 68 | NSW0962 | 19.2845  | 1780998 | 7.04   | 10.1308   | 104.905 | 5.262 |
| 69 | NSW0963 | 4.04471  | 491526  | 5.778  | 2.12483   | 45.066  | 3.639 |
| 70 | NSW0966 | 6.39348  | 672144  | 6.409  | 3.35871   | 97.581  | 4.335 |

|    |         |         |        |       |         |        |       |
|----|---------|---------|--------|-------|---------|--------|-------|
| 71 | NSW0970 | 10.1207 | 857272 | 8.3   | 5.31674 | 94.322 | 5.231 |
| 72 | NSW0972 | 11.1123 | 936771 | 8.229 | 5.83765 | 80.982 | 5.496 |

**Supplementary Table 8. Haplotype-resolved assembly quality of environmental samples (n = 71).** Genomes assembled with hifiasm (--ont). Table ordered by BUSCO scores, highest to lowest.

| sample_name | BUSCO | population | coverage | haplotype | mean_length | median_length | contigs | n50_length | stdev_length | total_bases |
|-------------|-------|------------|----------|-----------|-------------|---------------|---------|------------|--------------|-------------|
| NSW0293     | 98.79 | C          | 29.9479  | hap2      | 1,547,592   | 1,036,918     | 343     | 2,588,597  | 1,521,859    | 530,824,011 |
| NSW0293     | 98.45 | C          | 29.9479  | hap1      | 1,103,047   | 658,789       | 503     | 2,037,153  | 1,278,829    | 554,832,757 |
| NSW0438     | 95.18 | B          | 23.6787  | hap1      | 151,300     | 95,764        | 3,758   | 255,713    | 162,315      | 568,583,354 |
| NSW0438     | 93.9  | B          | 23.6787  | hap2      | 184,573     | 131,570       | 2,727   | 280,315    | 175,737      | 503,330,782 |
| NSW0306     | 92.73 | C          | 24.4949  | hap1      | 67,245      | 43,741        | 8,176   | 106,540    | 80,182       | 549,792,405 |
| NSW0306     | 91.23 | C          | 24.4949  | hap2      | 75,405      | 50,902        | 6,516   | 113,726    | 84,158       | 491,339,593 |
| NSW0576     | 93.64 | A          | 20.1635  | hap1      | 109,783     | 74,990        | 4,996   | 170,727    | 110,774      | 548,475,552 |
| NSW0576     | 90.15 | A          | 20.1635  | hap2      | 121,546     | 87,360        | 4,018   | 176,608    | 112,517      | 488,372,190 |
| NSW0544     | 88.74 | A          | 18.8856  | hap1      | 62,473      | 44,269        | 8,418   | 86,132     | 69,306       | 525,899,167 |
| NSW0496     | 86.98 | A          | 20.0196  | hap1      | 47,287      | 32,496        | 11,132  | 69,946     | 47,864       | 526,402,658 |
| NSW0496     | 85.04 | A          | 20.0196  | hap2      | 52,953      | 37,983        | 8,709   | 75,038     | 51,707       | 461,170,727 |
| NSW0544     | 84.73 | A          | 18.8856  | hap2      | 70,038      | 52,252        | 6,428   | 93,761     | 68,081       | 450,202,316 |
| NSW0313     | 85.43 | C          | 18.9491  | hap1      | 50,778      | 37,686        | 10,318  | 69,271     | 46,491       | 523,922,927 |
| NSW0141     | 84.44 | A          | 18.6357  | hap1      | 51,439      | 38,021        | 9,645   | 70,661     | 45,653       | 496,128,445 |
| NSW0313     | 82.93 | C          | 18.9491  | hap2      | 52,157      | 39,787        | 8,186   | 69,384     | 44,181       | 426,959,842 |
| NSW0962     | 83.71 | A          | 19.2845  | hap1      | 45,806      | 33,925        | 11,199  | 62,089     | 40,252       | 512,979,448 |
| NSW0532     | 83.79 | A          | 17.8178  | hap1      | 59,209      | 45,638        | 8,512   | 76,829     | 46,281       | 503,987,373 |
| NSW0532     | 81.99 | A          | 17.8178  | hap2      | 69,239      | 54,565        | 6,472   | 90,321     | 51,601       | 448,114,270 |
| NSW0250     | 85.34 | A          | 16.8051  | hap1      | 59,296      | 44,576        | 8,721   | 79,777     | 55,503       | 517,118,994 |
| NSW0141     | 80.56 | A          | 18.6357  | hap2      | 57,661      | 43,917        | 7,491   | 77,501     | 48,296       | 431,935,882 |
| NSW0308     | 81.17 | C          | 19.8459  | hap1      | 36,601      | 26,961        | 13,107  | 49,317     | 36,583       | 479,725,070 |
| NSW0170     | 81.6  | A          | 17.7472  | hap1      | 47,744      | 36,535        | 10,120  | 62,879     | 38,601       | 483,167,736 |
| NSW0962     | 79.63 | A          | 19.2845  | hap2      | 47,885      | 36,780        | 8,806   | 63,026     | 39,211       | 421,673,339 |
| NSW0324     | 81    | C          | 14.9675  | hap1      | 48,921      | 38,543        | 9,700   | 61,626     | 38,011       | 474,530,096 |
| NSW0366     | 79.32 | C          | 21.2167  | hap1      | 37,129      | 27,810        | 12,808  | 48,089     | 33,381       | 475,543,718 |
| NSW0250     | 78.42 | A          | 16.8051  | hap2      | 63,539      | 49,071        | 6,428   | 83,853     | 50,076       | 408,425,847 |
| NSW0170     | 77.73 | A          | 17.7472  | hap2      | 55,849      | 44,249        | 7,543   | 72,053     | 46,242       | 421,268,467 |
| NSW0359     | 77.08 | C          | 16.8905  | hap1      | 33,615      | 26,849        | 13,125  | 41,914     | 24,960       | 441,196,281 |
| NSW0324     | 75.15 | C          | 14.9675  | hap2      | 53,583      | 42,312        | 6,934   | 66,843     | 42,523       | 371,544,227 |

|         |       |   |         |      |        |        |        |        |        |             |
|---------|-------|---|---------|------|--------|--------|--------|--------|--------|-------------|
| NSW0493 | 76.27 | A | 14.8659 | hap1 | 42,726 | 33,208 | 10,838 | 52,725 | 40,837 | 463,068,729 |
| NSW0308 | 73.99 | C | 19.8459 | hap2 | 38,652 | 29,756 | 9,969  | 49,974 | 34,279 | 385,323,715 |
| NSW0337 | 77.04 | C | 16.0358 | hap1 | 37,298 | 29,626 | 12,406 | 45,914 | 27,221 | 462,714,827 |
| NSW0934 | 76.35 | A | 17.2554 | hap1 | 32,211 | 24,209 | 14,508 | 43,082 | 40,785 | 467,323,567 |
| NSW0350 | 75.67 | C | 15.6948 | hap1 | 31,941 | 24,022 | 14,059 | 40,295 | 33,279 | 449,051,886 |
| NSW0366 | 74.46 | C | 21.2167 | hap2 | 41,448 | 31,864 | 9,612  | 52,411 | 46,169 | 398,394,630 |
| NSW0491 | 73.69 | A | 17.7734 | hap1 | 26,088 | 19,805 | 16,265 | 33,807 | 26,558 | 424,318,531 |
| NSW0337 | 72.39 | C | 16.0358 | hap2 | 44,662 | 35,637 | 8,661  | 55,664 | 34,082 | 386,812,955 |
| NSW0357 | 72.36 | C | 13.7632 | hap1 | 36,389 | 29,986 | 11,831 | 43,592 | 24,032 | 430,515,197 |
| NSW0296 | 71.03 | C | 13.7463 | hap1 | 34,693 | 28,372 | 11,964 | 41,449 | 27,297 | 415,066,115 |
| NSW0356 | 69.05 | C | 13.5844 | hap1 | 26,038 | 21,124 | 14,579 | 31,617 | 19,647 | 379,613,800 |
| NSW0561 | 71.02 | A | 13.5694 | hap1 | 36,892 | 30,253 | 11,306 | 45,057 | 25,756 | 417,099,249 |
| NSW0934 | 69.35 | A | 17.2554 | hap2 | 33,799 | 26,285 | 10,835 | 42,864 | 38,797 | 366,214,720 |
| NSW0359 | 68.44 | C | 16.8905 | hap2 | 39,196 | 31,340 | 9,010  | 49,461 | 30,879 | 353,157,770 |
| NSW0163 | 70.68 | A | 13.6504 | hap1 | 37,948 | 31,294 | 11,167 | 45,785 | 25,790 | 423,762,578 |
| NSW0341 | 70.55 | C | 13.883  | hap1 | 31,540 | 25,543 | 13,042 | 38,004 | 23,224 | 411,339,821 |
| NSW0491 | 68.15 | A | 17.7734 | hap2 | 31,553 | 23,989 | 11,359 | 40,929 | 32,769 | 358,408,570 |
| NSW0159 | 71.41 | A | 12.5647 | hap1 | 40,826 | 33,108 | 9,976  | 49,117 | 28,723 | 407,276,499 |
| NSW0334 | 69.39 | C | 12.7057 | hap1 | 38,525 | 32,167 | 10,696 | 46,056 | 26,053 | 412,068,205 |
| NSW0536 | 67.67 | A | 12.7913 | hap1 | 29,309 | 24,168 | 13,056 | 34,831 | 21,233 | 382,652,192 |
| NSW0493 | 67.15 | A | 14.8659 | hap2 | 46,060 | 36,519 | 7,733  | 56,505 | 41,002 | 356,179,336 |
| NSW0354 | 66.13 | C | 14.2373 | hap1 | 24,837 | 20,157 | 14,853 | 29,936 | 18,419 | 368,908,822 |
| NSW0144 | 65.52 | A | 13.3328 | hap1 | 29,448 | 24,281 | 12,461 | 36,041 | 20,534 | 366,954,707 |
| NSW0350 | 64.1  | C | 15.6948 | hap2 | 33,495 | 26,306 | 9,678  | 41,664 | 29,408 | 324,166,737 |
| NSW0113 | 64.75 | B | 11.3181 | hap1 | 29,275 | 24,316 | 12,271 | 33,704 | 21,479 | 359,238,294 |
| NSW0343 | 64.19 | C | 11.1506 | hap1 | 32,968 | 27,677 | 10,813 | 39,119 | 21,501 | 356,477,162 |
| NSW0328 | 63.5  | C | 11.1906 | hap1 | 37,828 | 31,262 | 9,464  | 44,571 | 27,518 | 357,999,517 |
| NSW0972 | 61.74 | A | 11.1123 | hap1 | 29,178 | 24,511 | 11,805 | 34,175 | 19,772 | 344,446,817 |
| NSW0335 | 62.12 | C | 10.751  | hap1 | 33,237 | 28,349 | 10,180 | 38,965 | 20,677 | 338,351,538 |
| NSW0348 | 59.76 | C | 10.1471 | hap1 | 30,964 | 26,286 | 9,699  | 36,252 | 18,850 | 300,317,063 |
| NSW0561 | 58.17 | A | 13.5694 | hap2 | 42,154 | 34,781 | 7,095  | 51,612 | 28,216 | 299,079,802 |
| NSW0573 | 57.61 | A | 12.383  | hap1 | 17,521 | 14,628 | 17,567 | 21,024 | 12,790 | 307,798,328 |
| NSW0970 | 58.86 | A | 10.1207 | hap1 | 27,345 | 23,157 | 10,559 | 32,242 | 17,587 | 288,739,168 |
| NSW0347 | 56.06 | C | 9.58598 | hap1 | 29,475 | 25,165 | 9,350  | 34,616 | 18,034 | 275,591,477 |
| NSW0105 | 55.46 | B | 11.4163 | hap1 | 17,650 | 14,559 | 17,951 | 21,708 | 13,209 | 316,834,955 |
| NSW0357 | 55.5  | C | 13.7632 | hap2 | 42,089 | 34,188 | 7,177  | 51,001 | 28,214 | 302,069,105 |
| NSW0163 | 54.73 | A | 13.6504 | hap2 | 41,844 | 34,414 | 6,988  | 50,526 | 29,291 | 292,403,542 |
| NSW0175 | 54.47 | A | 9.84936 | hap1 | 27,837 | 23,107 | 9,981  | 32,607 | 18,523 | 277,839,838 |

|         |       |   |         |      |        |        |        |        |        |             |
|---------|-------|---|---------|------|--------|--------|--------|--------|--------|-------------|
| NSW0341 | 53.87 | C | 13.883  | hap2 | 33,571 | 27,632 | 7,944  | 40,210 | 22,829 | 266,684,305 |
| NSW0207 | 53.13 | A | 11.1162 | hap1 | 15,593 | 13,197 | 18,349 | 18,658 | 10,552 | 286,122,173 |
| NSW0566 | 51.72 | A | 12.2311 | hap1 | 14,295 | 11,874 | 19,866 | 17,219 | 10,254 | 283,989,607 |
| NSW0296 | 51.46 | C | 13.7463 | hap2 | 38,452 | 31,668 | 7,167  | 45,860 | 30,357 | 275,587,477 |
| NSW0555 | 50.94 | A | 11.2373 | hap1 | 14,123 | 11,668 | 17,706 | 17,025 | 10,983 | 250,060,142 |
| NSW0159 | 51.33 | A | 12.5647 | hap2 | 45,933 | 37,900 | 5,489  | 55,355 | 31,654 | 252,127,784 |
| NSW0334 | 47.89 | C | 12.7057 | hap2 | 41,908 | 35,064 | 5,784  | 49,933 | 28,214 | 242,393,300 |
| NSW0144 | 45.58 | A | 13.3328 | hap2 | 34,396 | 28,716 | 6,565  | 41,939 | 23,445 | 225,809,010 |
| NSW0356 | 44.59 | C | 13.5844 | hap2 | 29,764 | 24,635 | 7,763  | 36,712 | 22,953 | 231,054,062 |
| NSW0536 | 44.11 | A | 12.7913 | hap2 | 32,975 | 27,500 | 7,089  | 39,516 | 22,896 | 233,755,982 |
| NSW0354 | 43.29 | C | 14.2373 | hap2 | 29,040 | 24,054 | 7,711  | 35,144 | 21,541 | 223,925,553 |
| NSW0083 | 43.21 | B | 8.95098 | hap1 | 18,659 | 16,348 | 10,773 | 20,780 | 11,728 | 201,015,574 |
| NSW0299 | 38    | C | 9.98593 | hap1 | 13,100 | 11,088 | 14,452 | 15,771 | 9,511  | 189,326,335 |
| NSW0343 | 38.61 | C | 11.1506 | hap2 | 37,569 | 31,721 | 4,641  | 44,563 | 24,672 | 174,357,823 |
| NSW0575 | 37.14 | A | 8.35824 | hap1 | 19,149 | 17,056 | 9,225  | 21,242 | 10,629 | 176,644,650 |
| NSW0328 | 36.71 | C | 11.1906 | hap2 | 43,967 | 36,150 | 4,134  | 52,360 | 33,175 | 181,760,317 |
| NSW0113 | 31.81 | B | 11.3181 | hap2 | 34,306 | 27,857 | 5,136  | 40,054 | 27,180 | 176,196,528 |
| NSW0119 | 31.55 | B | 7.69559 | hap1 | 16,842 | 14,862 | 8,219  | 18,886 | 11,410 | 138,422,365 |
| NSW0335 | 31.99 | C | 10.751  | hap2 | 37,694 | 32,057 | 4,177  | 44,913 | 23,454 | 157,448,980 |
| NSW0972 | 31.51 | A | 11.1123 | hap2 | 32,158 | 26,939 | 4,885  | 37,448 | 22,556 | 157,093,964 |
| NSW0348 | 28.85 | C | 10.1471 | hap2 | 35,548 | 30,037 | 3,597  | 41,265 | 22,751 | 127,865,091 |
| NSW0315 | 27.99 | C | 6.49355 | hap1 | 24,122 | 20,990 | 4,659  | 27,553 | 14,370 | 112,385,863 |
| NSW0970 | 26.61 | A | 10.1207 | hap2 | 31,801 | 26,366 | 3,707  | 37,754 | 22,294 | 117,884,897 |
| NSW0573 | 25.88 | A | 12.383  | hap2 | 20,394 | 16,793 | 6,974  | 24,263 | 15,526 | 142,229,146 |
| NSW0111 | 25.58 | B | 7.71839 | hap1 | 15,157 | 12,913 | 8,899  | 18,135 | 10,910 | 134,884,111 |
| NSW0105 | 24.63 | B | 11.4163 | hap2 | 20,766 | 17,204 | 6,855  | 24,944 | 16,346 | 142,351,612 |
| NSW0347 | 23.73 | C | 9.58598 | hap2 | 33,867 | 28,881 | 3,075  | 39,472 | 21,440 | 104,140,489 |
| NSW0954 | 23.82 | A | 6.24472 | hap1 | 25,288 | 21,753 | 4,025  | 28,704 | 16,036 | 101,783,963 |
| NSW0175 | 20.59 | A | 9.84936 | hap2 | 32,866 | 27,394 | 3,308  | 38,857 | 23,069 | 108,720,548 |
| NSW0207 | 20.08 | A | 11.1162 | hap2 | 18,475 | 15,593 | 6,041  | 22,104 | 12,884 | 111,608,044 |
| NSW0966 | 18.61 | A | 6.39348 | hap1 | 17,200 | 14,685 | 4,228  | 19,468 | 11,857 | 72,720,101  |
| NSW0566 | 18.78 | A | 12.2311 | hap2 | 17,078 | 13,954 | 6,846  | 20,149 | 13,110 | 116,914,401 |
| NSW0555 | 15.99 | A | 11.2373 | hap2 | 17,208 | 13,819 | 4,818  | 20,549 | 15,110 | 82,907,674  |
| NSW0108 | 15.18 | B | 5.89502 | hap1 | 15,495 | 13,852 | 4,399  | 17,346 | 9,272  | 68,160,652  |
| NSW0083 | 9.24  | B | 8.95098 | hap2 | 21,249 | 18,281 | 2,389  | 23,485 | 17,719 | 50,763,044  |
| NSW0299 | 7.74  | C | 9.98593 | hap2 | 16,302 | 13,639 | 2,936  | 19,384 | 14,463 | 47,861,999  |
| NSW0575 | 6.83  | A | 8.35824 | hap2 | 21,558 | 18,333 | 1,731  | 24,342 | 15,440 | 37,316,211  |
| NSW0939 | 6.11  | A | 4.3979  | hap1 | 12,216 | 9,979  | 2,049  | 14,303 | 13,893 | 25,031,483  |

|         |      |   |         |      |        |        |       |        |        |            |
|---------|------|---|---------|------|--------|--------|-------|--------|--------|------------|
| NSW0133 | 5.42 | B | 1.00533 | hap1 | 12,999 | 11,088 | 1,856 | 15,295 | 17,427 | 24,125,211 |
| NSW0133 | 5.42 | B | 1.00533 | hap2 | 12,951 | 11,088 | 1,842 | 15,186 | 15,987 | 23,856,154 |
| NSW0119 | 3.49 | B | 7.69559 | hap2 | 20,002 | 16,268 | 1,065 | 22,419 | 24,296 | 21,302,456 |
| NSW0194 | 3.23 | A | 4.04678 | hap1 | 14,395 | 11,986 | 1,069 | 16,836 | 15,621 | 15,388,655 |
| NSW0954 | 3.06 | A | 6.24472 | hap2 | 27,621 | 23,009 | 541   | 30,764 | 23,414 | 14,943,080 |
| NSW0315 | 2.75 | C | 6.49355 | hap2 | 28,804 | 23,845 | 571   | 33,159 | 22,767 | 16,446,969 |
| NSW0111 | 2.71 | B | 7.71839 | hap2 | 19,511 | 15,968 | 1,338 | 22,716 | 16,889 | 26,105,869 |
| NSW0963 | 2.24 | A | 4.04471 | hap1 | 13,226 | 11,274 | 1,028 | 14,918 | 13,527 | 13,596,083 |
| NSW0192 | 2.06 | A | 3.55784 | hap1 | 13,592 | 11,371 | 783   | 15,911 | 15,257 | 10,642,654 |
| NSW0966 | 1.42 | A | 6.39348 | hap2 | 22,514 | 17,738 | 444   | 26,181 | 25,232 | 9,996,073  |
| NSW0940 | 1.2  | A | 3.20183 | hap1 | 12,505 | 9,736  | 437   | 14,141 | 16,856 | 5,464,778  |
| NSW0120 | 0.99 | B | 3.36433 | hap1 | 13,049 | 10,269 | 479   | 14,475 | 18,775 | 6,250,283  |
| NSW0108 | 0.86 | B | 5.89502 | hap2 | 18,742 | 15,794 | 440   | 20,743 | 18,608 | 8,246,245  |
| NSW0194 | 0.9  | A | 4.04678 | hap2 | 16,722 | 12,954 | 326   | 18,536 | 25,152 | 5,451,270  |
| NSW0963 | 0.95 | A | 4.04471 | hap2 | 16,164 | 12,943 | 319   | 17,557 | 21,887 | 5,156,270  |
| NSW0939 | 0.56 | A | 4.3979  | hap2 | 18,832 | 13,931 | 231   | 22,391 | 26,325 | 4,350,083  |
| NSW0935 | 0.47 | A | 2.77763 | hap1 | 11,526 | 7,646  | 366   | 13,891 | 22,458 | 4,218,391  |
| NSW0209 | 0.39 | A | 2.39105 | hap1 | 11,634 | 9,309  | 205   | 14,924 | 12,026 | 2,384,899  |
| NSW0192 | 0.34 | A | 3.55784 | hap2 | 18,521 | 13,397 | 211   | 20,835 | 26,583 | 3,907,861  |
| NSW0120 | 0.26 | B | 3.36433 | hap2 | 19,429 | 12,870 | 135   | 20,567 | 31,756 | 2,622,878  |
| NSW0209 | 0.26 | A | 2.39105 | hap2 | 12,415 | 9,818  | 136   | 15,372 | 13,614 | 1,688,383  |
| NSW0935 | 0.26 | A | 2.77763 | hap2 | 12,359 | 8,231  | 231   | 14,489 | 21,278 | 2,854,909  |
| NSW0938 | 0.3  | A | 2.33443 | hap1 | 12,667 | 8,809  | 235   | 16,530 | 16,705 | 2,976,792  |
| NSW0110 | 0.21 | B | 2.04307 | hap1 | 20,843 | 13,308 | 96    | 23,739 | 44,267 | 2,000,950  |
| NSW0938 | 0.21 | A | 2.33443 | hap2 | 14,441 | 9,365  | 145   | 18,588 | 19,016 | 2,093,878  |
| NSW0940 | 0.17 | A | 3.20183 | hap2 | 19,011 | 12,053 | 124   | 20,198 | 29,443 | 2,357,384  |
| NSW0110 | 0.13 | B | 2.04307 | hap2 | 25,362 | 13,411 | 59    | 35,391 | 55,638 | 1,496,370  |
| NSW0936 | 0.13 | A | 1.81097 | hap1 | 14,616 | 8,967  | 119   | 19,628 | 20,827 | 1,739,330  |
| NSW0936 | 0.13 | A | 1.81097 | hap2 | 14,289 | 8,855  | 116   | 19,124 | 20,894 | 1,657,519  |

**Supplementary Table 9 Size and frequency of SVs discovered by Sniffles2**

| Variant type | Count   | Median size | Mean size | Total bases (Mb) | Percentage (%) |
|--------------|---------|-------------|-----------|------------------|----------------|
| Deletions    | 339,168 | 119         | 807.44    | 273.86           | 59.10          |
| Insertions   | 229,942 | 231         | 641.01    | 147.39           | 40.07          |
| Duplications | 3,280   | 12,467.5    | 20,343.52 | 66.73            | 0.57           |
| Inversions   | 1,499   | 3,709       | 16,788.48 | 25.17            | 0.26           |

|              |         |          |           |               |        |
|--------------|---------|----------|-----------|---------------|--------|
| <b>Total</b> | 573,889 | 16,526.5 | 38,580.45 | <b>513.14</b> | 100.00 |
|--------------|---------|----------|-----------|---------------|--------|

**Supplementary Table 10. Percent of different chromosomes of the reference genome covered by SVs discovered by Sniffles2**

| <b>Chr</b>     | <b>Percent of chromosome with SVs (%)</b> |
|----------------|-------------------------------------------|
| 1              | 37.57                                     |
| 2              | 40.15                                     |
| 3              | 40.44                                     |
| 4              | 39.11                                     |
| 5              | 46.25                                     |
| 6              | 32.8                                      |
| 7              | 40.29                                     |
| 8              | 40.51                                     |
| 9              | 34.65                                     |
| 10             | 33.79                                     |
| 11             | 33.67                                     |
| <b>Overall</b> | <b>38.46</b>                              |

**Supplementary Table 11. Number of SVs intersecting with different gene features**

| <b>SV type</b> | <b>5 kb upstream</b> | <b>Genic</b> | <b>Exonic</b> | <b>Intronic</b> | <b>5 kb downstream</b> | <b>Intergenic</b> |
|----------------|----------------------|--------------|---------------|-----------------|------------------------|-------------------|
| Deletion       | 19,705               | 15,039       | 3,546         | 10,789          | 19,612                 | 291,341           |
| Insertion      | 17,661               | 12,361       | 5,266         | 8,167           | 17,345                 | 190,302           |
| Duplication    | 617                  | 623          | 568           | 548             | 596                    | 2,353             |
| Inversion      | 219                  | 180          | 155           | 166             | 216                    | 1,160             |
| All            | 38,202               | 28,203       | 9,535         | 19,670          | 37,769                 | 485,156           |
| Percentage     | <b>6.66%</b>         | <b>4.91%</b> | <b>1.66%</b>  | <b>3.43%</b>    | <b>6.58%</b>           | <b>84.54%</b>     |

Supplementary Table 12. SV-GWAS results for *CHILL1* and *CHILL8*

| SV type                     | Size (bp) | Locus                   | Chr      | Pos               | GWAS -log <sub>10</sub> (p-value) | Freq (%)  | Effect (°C)  | SE              | % variation | Associated genes                            |
|-----------------------------|-----------|-------------------------|----------|-------------------|-----------------------------------|-----------|--------------|-----------------|-------------|---------------------------------------------|
| <b>Intercept (BioClim6)</b> |           |                         |          |                   |                                   |           | <b>-0.85</b> | <b>0.18</b>     |             |                                             |
| <b>Full model</b>           |           |                         |          |                   |                                   |           |              |                 | <b>84</b>   |                                             |
| Insertion                   | 485       | <i>CHILL-1.1</i>        | 1        | 27,696,962        | 8.0                               | 45        | -1.95        | 0.15 ***        | 69          |                                             |
| Deletion                    | 64        | <i>CHILL-1.2</i>        | 1        | 27,698,414        | 9.0                               | 43        | -2.03        | 0.14 ***        | 73          |                                             |
| <b>Deletion</b>             | <b>58</b> | <b><i>CHILL-1.3</i></b> | <b>1</b> | <b>27,713,800</b> | <b>12.5</b>                       | <b>43</b> | <b>-2.06</b> | <b>0.13 ***</b> | <b>76</b>   | GPI-anchor protein, Chlorophyll a reductase |
| Deletion                    | 402       | <i>CHILL-1.4</i>        | 1        | 27,736,703        | 7.8                               | 45        | -1.96        | 0.15 ***        | 68          |                                             |
| Insertion                   | 323       | <i>CHILL-1.5</i>        | 1        | 27,799,070        | 9.2                               | 43        | -2.04        | 0.14 ***        | 74          |                                             |
| Insertion                   | 1024      | <i>CHILL-4.1</i>        | 4        | 25,787,765        | 8.2                               | 47        | -1.96        | 0.14 ***        | 71          |                                             |
| Deletion                    | 123       | <i>CHILL-6.1</i>        | 6        | 34,505,641        | 9.9                               | 49        | -1.92        | 0.13 ***        | 76          |                                             |
| <b>Deletion</b>             | <b>60</b> | <b><i>CHILL-8.1</i></b> | <b>8</b> | <b>38,494,586</b> | <b>7.1</b>                        | <b>10</b> | <b>1.25</b>  | <b>0.26 ***</b> | <b>64</b>   | Phosphatase, Phosphate transporter          |
| Deletion                    | 52        | <i>CHILL-8.2</i>        | 8        | 38,503,991        | 8.5                               | 51        | -1.85        | 0.14 ***        | 71          |                                             |
| Deletion                    | 221       | <i>CHILL-8.3</i>        | 8        | 38,507,136        | 9.0                               | 51        | -1.86        | 0.13 ***        | 72          |                                             |

**Supplementary Table 13. Characterisation of genes residing at the *CHILL8* locus.**

Expression was detected by Oxford Nanopore Technologies direct RNA sequencing and reported as Transcripts Per Million (TPM).

| Gene ID   | Gene name                                                                          | Protein length | Arabidopsis ortholog                                              | Expression (TPM)          |
|-----------|------------------------------------------------------------------------------------|----------------|-------------------------------------------------------------------|---------------------------|
| g34497.t1 | probable inorganic phosphate transporter 1-3 [Eucalyptus grandis]                  | 534            | AT5G43350 phosphate transporter 1;1 (PHT1;1)                      | 1,476.39 (reverse strand) |
| g34498.t1 | serine/threonine-protein phosphatase PP1 isozyme 3 isoform X1 [Eucalyptus grandis] | 324            | AT2G39840 type one serine/threonine protein phosphatase 4 (TOPP4) | 40.27 (forward strand)    |

**Supplementary Table 14. Characterisation of genes residing at the *CHILL1* locus.**

Expression was detected by Oxford Nanopore Technologies direct RNA sequencing and reported as Transcripts Per Million (TPM). Uncharacterised genes with no match or ortholog are labelled NA.

| Gene ID  | Gene name                                                 | Protein length | Arabidopsis ortholog                                 | Expression (TPM) |
|----------|-----------------------------------------------------------|----------------|------------------------------------------------------|------------------|
| g2294.t1 | $\alpha$ -Terpineol synthase                              | 711            | Terpene Synthase 4 AT4G16740                         | 0                |
| g2295.t1 | GPI-anchored protein                                      | 205            | GPI-anchored protein At1G61900                       | 0                |
| g2296.t1 | NA                                                        | 169            | NA                                                   | 0                |
| g2297.t1 | 7-hydroxymethyl chlorophyll a reductase                   | 350            | AT1G04620                                            | 13.42            |
| g2298.t1 | (+)- $\alpha$ -Terpineol synthase-like [Syzygium oleosum] | 714            | terpene synthase-like sequence-1,8-cineole AT3G25820 | 0                |
| g2299.t1 | GPI-anchored protein                                      | 212            | GPI-anchored protein At1G61900                       | 0                |

**Supplementary Table 15. Results from linear models exploring relationships between BioClim6, geography, *CHILL1*, species and principal components (PCs) based on genome-wide and *CHILL1* SNPs.**

| Dependent variable | Factors in model                     | Variance explained by model (R <sup>2</sup> ) (%) | Factor level           | P-value           | Effect size    | Units for effect size    | Change required to achieve equivalent shift in BioClim6 from -2°C to 0°C |
|--------------------|--------------------------------------|---------------------------------------------------|------------------------|-------------------|----------------|--------------------------|--------------------------------------------------------------------------|
| BioClim6           | Latitude + elevation                 | 72.5                                              | Latitude               | 10 <sup>-16</sup> | 0.50           | Latitude degrees (111km) | Translocate from latitude -36° to -32° (444km) if at 1200m               |
|                    |                                      |                                                   | Elevation              | 10 <sup>-16</sup> | -0.35          | 100m elevation           | Translocate from altitude of 1200m to 600m if at latitude of -36°        |
| BioClim6           | <i>CHILL1</i>                        | 15.8                                              | <i>CHILL1/CHILL1</i>   | -                 | 0 <sup>a</sup> | -                        | From <i>CHILL1/CHILL1</i> to <i>chill1/chill1</i>                        |
|                    |                                      |                                                   | <i>CHILL1/chill1</i>   | 10 <sup>-6</sup>  | 0.83           | One allele               |                                                                          |
|                    |                                      |                                                   | <i>chill1/chill1</i>   | 10 <sup>-16</sup> | 1.59           | Two alleles              |                                                                          |
| BioClim6           | Species                              | 0.8                                               | <i>E. dalrympleana</i> | -                 | 0 <sup>a</sup> | -                        | -                                                                        |
|                    |                                      |                                                   | <i>E. rubida</i>       | 0.37              | -0.17          | -                        | -                                                                        |
|                    |                                      |                                                   | <i>E. viminalis</i>    | 0.36              | 0.164          | -                        | -                                                                        |
| BioClim6           | Latitude + elevation + <i>CHILL1</i> | 74.7                                              | Latitude               | 10 <sup>-16</sup> | 0.59           | -                        | -                                                                        |
|                    |                                      |                                                   | Elevation              | 10 <sup>-16</sup> | -0.34          | -                        | -                                                                        |
|                    |                                      |                                                   | <i>CHILL1/CHILL1</i>   | -                 | 0 <sup>a</sup> | -                        | -                                                                        |
|                    |                                      |                                                   | <i>CHILL1/chill1</i>   | 0.02              | -0.24          | -                        | -                                                                        |
|                    |                                      |                                                   | <i>chill1/chill1</i>   | 10 <sup>-9</sup>  | -0.82          | -                        | -                                                                        |
| BioClim6           | Latitude +                           | 73.8                                              | Latitude               | 10 <sup>-16</sup> | 0.49           | -                        | -                                                                        |

|          |                                         |       |                        |                   |                |   |   |
|----------|-----------------------------------------|-------|------------------------|-------------------|----------------|---|---|
|          | elevation + species                     |       | Elevation              | 10 <sup>-16</sup> | -0.38          | - | - |
|          |                                         |       | <i>E. dalrympleana</i> | -                 | 0 <sup>a</sup> | - | - |
|          |                                         |       | <i>E. rubida</i>       | 0.007             | -0.29          | - | - |
|          |                                         |       | <i>E. viminalis</i>    | 10 <sup>-7</sup>  | -0.44          | - | - |
| BioClim6 | Latitude + elevation + species + CHILL1 | 75.4  | Latitude               | 10 <sup>-16</sup> | 0.57           | - | - |
|          |                                         |       | Elevation              | 10 <sup>-16</sup> | -0.37          | - | - |
|          |                                         |       | CHILL1/CHILL1          | -                 | 0 <sup>a</sup> | - | - |
|          |                                         |       | CHILL1/chill1          | 0.007             | -0.18          | - | - |
|          |                                         |       | chill1/chill1          | 10 <sup>-7</sup>  | -0.74          | - | - |
|          |                                         |       | <i>E. dalrympleana</i> | -                 | 0 <sup>a</sup> | - | - |
|          |                                         |       | <i>E. rubida</i>       | 0.006             | -0.29          | - | - |
|          |                                         |       | <i>E. viminalis</i>    | 0.001             | -0.32          | - | - |
| BioClim6 | Genome-wide PC1 & PC2                   | 0.9   | PC1                    | 0.10              | 0.002          | - | - |
|          |                                         |       | PC2                    | 0.250             | 0.002          | - | - |
| BioClim6 | Genome-wide PC3 & PC4                   | 54.00 | PC3                    | 10 <sup>-16</sup> | 0.031          | - | - |
|          |                                         |       | PC4                    | 0.07              | -0.004         | - | - |
| BioClim6 | CHILL1 + PC1 & PC2                      | 15.0  | PC1                    | 10 <sup>-16</sup> | 0.022          | - | - |
|          |                                         |       | PC2                    | 0.79              | 0.003          | - | - |

|                                                            |      |                   |                        |                   |        |   |                                                                                          |
|------------------------------------------------------------|------|-------------------|------------------------|-------------------|--------|---|------------------------------------------------------------------------------------------|
| BioClim6 <i>CHILL1</i> + PC3 & PC4                         | 0.04 |                   | PC3                    | 0.68              | 0.005  | - | -                                                                                        |
|                                                            |      |                   | PC4                    | 0.99              | 0.0001 | - | -                                                                                        |
| <i>CHILL1</i> BioClim6                                     |      | <sup>b</sup> 14.4 | BioClim6               | 10 <sup>-11</sup> | 0.58   |   | Decrease in frequency of <i>CHILL1</i> allele from 0.88 to 0.69.                         |
| BioClim6 + species                                         |      | 24.0              | BioClim6               | 10 <sup>-11</sup> | 0.60   |   | Decrease in frequency of <i>CHILL1</i> allele from 0.79 to 0.53 if <i>E. viminalis</i> . |
|                                                            |      |                   | <i>E. dalrympleana</i> | -                 | 0      |   | -                                                                                        |
|                                                            |      |                   | <i>E. rubida</i>       | 0.005             | -1.19  |   |                                                                                          |
|                                                            |      |                   | <i>E. viminalis</i>    | 0.002             | 0.86   |   |                                                                                          |
| <i>CHILL1</i> BioClim6 + Genome-wide PC1 + Genome-wide PC2 |      | 22.1              | BioClim6               | 10 <sup>-11</sup> | 0.60   |   | -                                                                                        |
|                                                            |      |                   | PC1                    | 10 <sup>-7</sup>  | 0.011  |   | -                                                                                        |
|                                                            |      |                   | PC2                    | 0.60              | 0.0026 |   | -                                                                                        |
| <i>CHILL1</i> Latitude + elevation                         |      | 37.3              | Latitude               | 10 <sup>-17</sup> | 0.68   |   | -                                                                                        |
|                                                            |      |                   | Elevation              | 0.08              | -0.13  |   | -                                                                                        |
| <i>CHILL1</i> BioClim6 + latitude + elevation              |      | 40.1              | BioClim6               | 0.0007            | -0.65  |   | -                                                                                        |
|                                                            |      |                   | Latitude               | 10 <sup>-15</sup> | 1.020  |   | -                                                                                        |

|               |                                                                                                          |      |           |                   |        |   |
|---------------|----------------------------------------------------------------------------------------------------------|------|-----------|-------------------|--------|---|
|               |                                                                                                          |      | Elevation | 0.0006            | -0.35  | - |
| <i>CHILL1</i> | BioClim6 +<br>Genome-wide<br>PC1 +<br>Genome-wide<br>PC2 +<br>Genome-wide<br>PC3 +<br>Genome-wide<br>PC4 | 46.2 | BioClim6  | 0.3               | -0.16  |   |
|               |                                                                                                          |      | PC1       | 0.001             | -0.020 | - |
|               |                                                                                                          |      | PC2       | 0.50              | 0.006  | - |
|               |                                                                                                          |      | PC3       | 10 <sup>-10</sup> | 0.103  | - |
|               |                                                                                                          |      | PC4       | 10 <sup>-7</sup>  | -0.074 | - |

- Reference factor level against which estimates for other factor levels are compared. “-” denotes irrelevant or uninterpretable.
- McFadden’s  $R^2$  was used for models where the dependent variable was binomial.
- Estimates of effects are on the logit scale but translated to the response scale in the table’s last column.

**Supplementary Table 16. Frequencies of *CHILL1* genotypes and alleles by species and geographic population**

| Species                       | No. of genotypes | <sup>a</sup> Population |         |       |
|-------------------------------|------------------|-------------------------|---------|-------|
|                               |                  | South                   | Central | North |
| <b><i>E. viminalis</i></b>    |                  |                         |         |       |
| <i>CHILL1/CHILL1</i>          | 89               | 0.83                    | 0.08    | 0.03  |
| <i>CHILL1/chill1</i>          | 43               | 0.15                    | 0.51    | 0.24  |
| <i>chill1/chill1</i>          | 44               | 0.02                    | 0.38    | 0.74  |
| Total                         | 176              | 102                     | 26      | 38    |
| <b><i>E. dalrympleana</i></b> |                  |                         |         |       |
| <i>CHILL1/CHILL1</i>          | 102              | 0.89                    | 0.92    | 0.09  |
| <i>CHILL1/chill1</i>          | 15               | 0.11                    | 0.06    | 0.22  |
| <i>chill1/chill1</i>          | 21               | 0.03                    | 0.04    | 0.70  |
| Total                         | 138              | 66                      | 48      | 24    |
| <b><i>E. rubida</i></b>       |                  |                         |         |       |
| <i>CHILL1/CHILL1</i>          | 103              | 0.83                    | 0.90    | 0.00  |
| <i>CHILL1/chill1</i>          | 16               | 0.15                    | 0.11    | 0.00  |
| <i>chill1/chill1</i>          | 1                | 0.01                    | 0.00    | 0.00  |
| Total                         | 120              | 82                      | 38      | 0     |
| <b>All species</b>            |                  |                         |         |       |
| <i>CHILL1/CHILL1</i>          | 294              | 0.84                    | 0.66    | 0.05  |
| <i>CHILL1/chill1</i>          | 74               | 0.14                    | 0.21    | 0.23  |
| <i>chill1/chill1</i>          | 66               | 0.02                    | 0.13    | 0.73  |
| Total                         | 434              | 250                     | 122     | 62    |

a. South, below -35° latitude; North, greater than -30°; Central, between -35° and -30°
